# Supplementary material
Source: Research Square preprint supplement (doi:10.21203/rs.3.rs-9713820/v1)

**Supplementary Tables**

**Supplementary Figure-S1: Study flow**


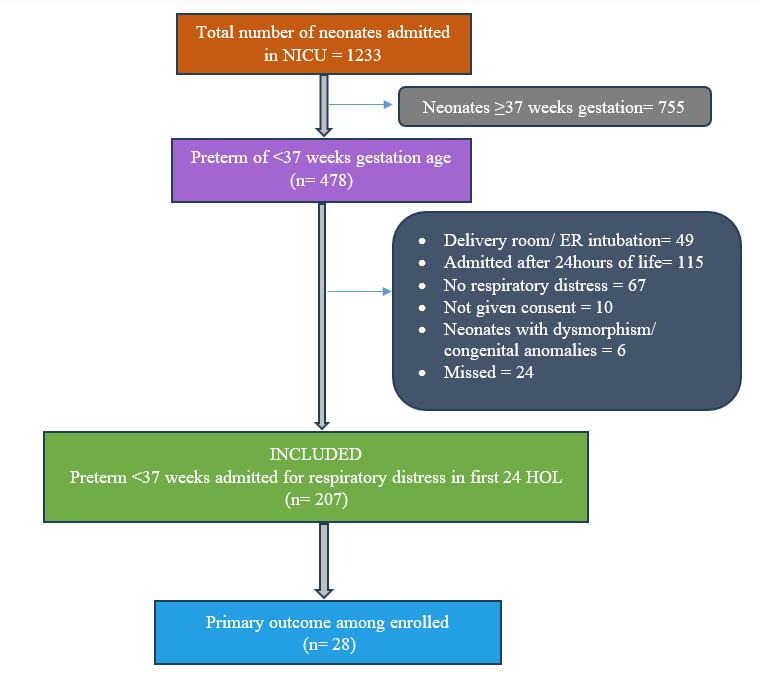


**Supplementary Table 1:** Mode of Respiratory Support on Days 1, 2, and 3

| **Mode of Support** | **Day 1 n (%)** | **Day 2 n (%)** | **Day 3 n (%)** |
| --- | --- | --- | --- |
| Invasive mechanical ventilation | 17 (8.2%) | 4 (2.1%) | 5 (2.8%) |
| CPAP | 126 (60.9%) | 49 (25.9%) | 36 (19.9%) |
| NIPPV | 12 (5.8%) | 5 (2.6%) | 2 (1.1%) |
| HFNC | 1 (0.5%) | 2 (1.1%) | 2 (1.1%) |
| Supplemental oxygen | 3 (1.4%) | 1 (0.5%) | 2 (1.1%) |
| Room air | 65 (31.4%) | 132 (69.8%) | 139 (76.8%) |

**Supplementary Table 2:** Diagnostic Accuracy of LUS Score on Days 1, 2, and 3 for Predicting Surfactant Requirement

| **Metric** | **Day 1 LUS ≥4** | **Day 2 LUS ≥2** | **Day 3 LUS ≥1** |
| --- | --- | --- | --- |
| AUC (95% CI) | 0.84 (0.75–0.93) | 0.85 (0.76–0.94) | 0.68 (0.55–0.82) |
| Sensitivity (95% CI) | 78% (61–90%) | 59% (36–79%) | 69% (41–89%) |
| Specificity (95% CI) | 82% (76–88%) | 90% (85–94%) | 67% (60–74%) |
| PPV (95% CI) | 48% (35–62%) | 45% (26–64%) | 17% (9–28%) |
| NPV (95% CI) | 95% (90–98%) | 94% (90–97%) | 96% (90–99%) |
| Positive LR (95% CI) | 4.43 (3.07–6.41) | 6.17 (3.45–11.03) | 2.10 (1.41–3.12) |
| Negative LR (95% CI) | 0.27 (0.15–0.50) | 0.45 (0.27–0.75) | 0.46 (0.22–0.97) |

**Supplementary Figure S2:** Distribution of Day-1 LUS scores stratified by IMV requirement within 7 days of life


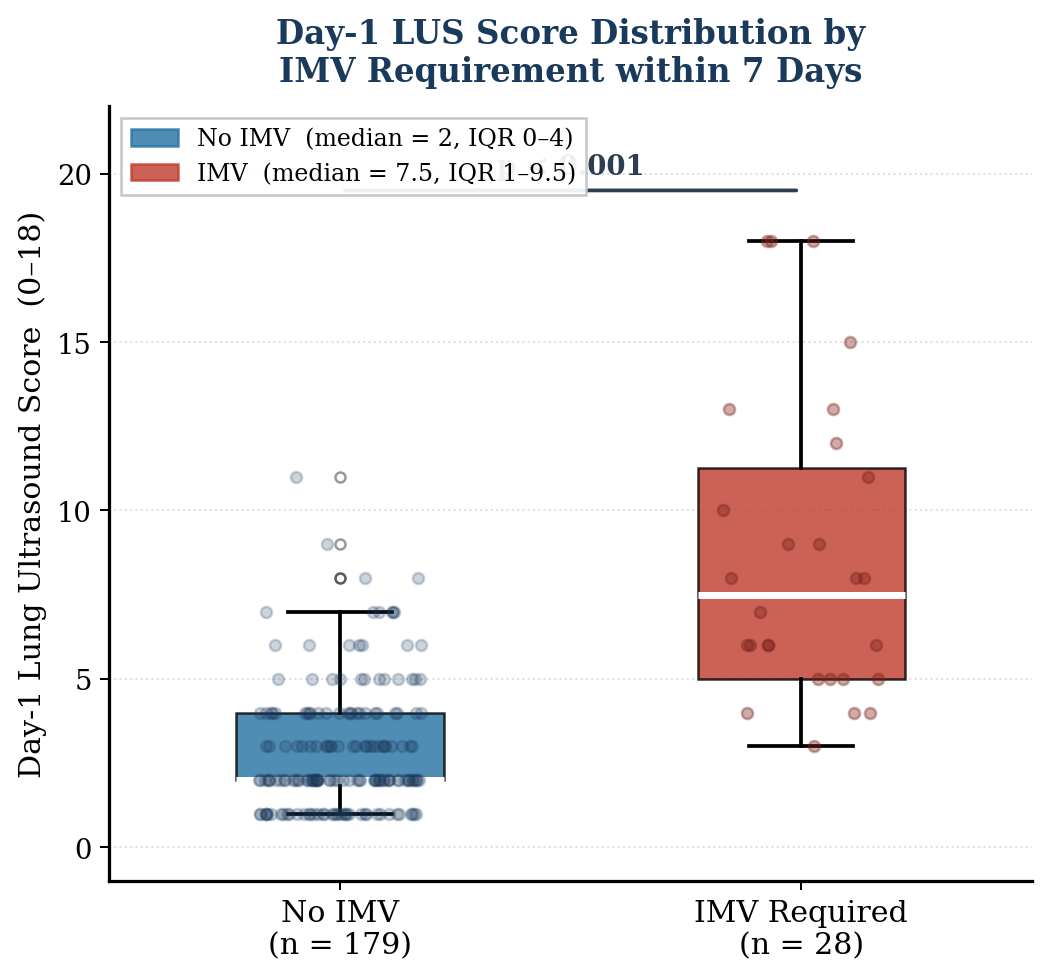


**Supplementary Table 3**: Multivariate Logistic Regression - Predictors of IMV by Day 7

| **Variable** | **Odds Ratio** | **95% CI (Lower)** | **95% CI (Upper)** | **p-value** |
| --- | --- | --- | --- | --- |
| **Predictors of IMV by Day 7** | | | | |
| Surfactant use | 61.50 | 9.15 | 1251.23 | <0.001 |
| Hs-PDA | 6.83 | 1.22 | 55.36 | 0.040 |
| SNAPPE-II score (per unit increase) | 1.06 | 1.00 | 1.12 | 0.044 |
| **(Model: pseudo-R² = 0.192, AIC = 220.95)** | | | | |

**Supplementary Table 4:** Predictive Performance of Day 1 LUS for IMV by Day 7 and Surfactant Requirement Across Subgroups

| **Outcome** | **Cohort** | **Optimal Threshold** | **AUC (95% CI)** | **Performance** |
| --- | --- | --- | --- | --- |
| **IMV by Day 7** | GA <32 wks | LUS score: ≥6 | 0.684  (0.521–0.850) | Sensitivity 62.5%, Specificity 81.2%,  PPV 52.6%, NPV 86.7%;  LR+ 3.33 / LR− 0.46 |
| Respiratory support | LUS score: ≥5 | 0.693  (0.553–0.822) | Sensitivity 65.4%, Specificity 71.7%,  PPV 34.7%, NPV 90.0% LR+ 2.31 / LR− 0.48 |
| **Surfactant Requirement** | GA <32 wks | LUS score: ≥7 | 0.815  (0.696–0.934) | Sensitivity 63.6%, Specificity 95.2%,  PPV 87.5%, NPV 83.3%  LR+ 13.36 / LR− 0.38 |
| Respiratory support | LUS score: ≥8 | 0.830  (0.726–0.919) | Sensitivity 66.7%, Specificity 95.1%, PPV 82.8%, NPV 89.1% LR+ 13.73 / LR− 0.35 |

**Supplementary Figure S3:** ROC Curves for LUS Day 1 Score across sub-groups and outcomes(top row: IMV; bottom row: Surfactant)


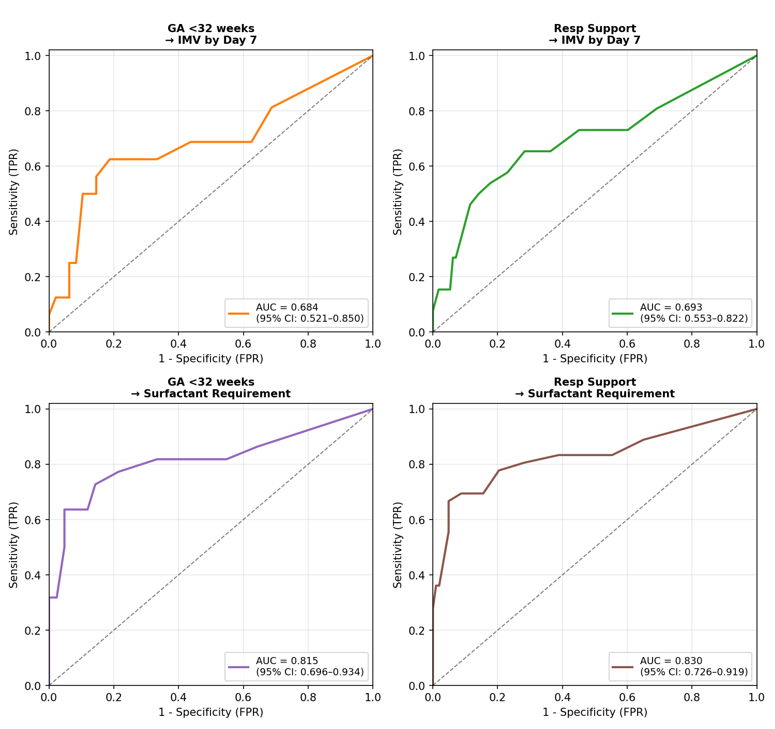

Supplement: Supplementary file 1 [file c524ca684254030045ea346b.docx]
